# Supplementary material
Source: HighWire-hosted journal article supplement (https://bmjopenquality.bmj.com/highwire/filestream/135895/field_highwire_adjunct_files/0/ds4027.xlsx)
Supplement: ds4027.xlsx [file ds4027.xlsx]

## Sheet: Sheet1
1. BASELINE DATA - NUMBER AND LOCATION OF NG TUBES
LOCATION	Ward 7	Ward 8	ITU	CCU	TOTAL
NUMBER OF INSERTIONS	8	3	1	1	13
2. BASLINE DATA - Quality of whether guidelines were followed (score out of 3) - by ward									3. BASELINE DATA - Quality of documentation (score out of 7) nurse and case notes									3. BASELINE DATA - Quality of documentation (score out of 7) case notes only
ID No	LOCATION	Indication	Placement Confirmed	No additional tests	Score		ID No	LOCATION	Indication	Insertion	Length	Nostril	Aspirate	Confirmation	Instructions	Score		Indication	Insertion	Length	Nostril	Aspirate	Confirmation	Instructions	Score
1	Ward 7	1	1	1	3		1	Ward 7	1	1	1	0	1	0	0	4		1	0	0	0	0	0	0	1
2	Ward 7	1	0	1	2		2	Ward 7	1	1	0	0	1	0	0	3		1	1	0	0	0	0	0	2
3	Ward 7	1	1	1	3		3	Ward 7	1	1	1	0	1	0	0	4		1	0	0	0	0	0	0	1
4	Ward 7	1	1	1	3		4	Ward 7	1	1	1	1	1	1	0	6		1	0	0	0	0	0	0	1
5	Ward 7	1	0	1	2		5	Ward 7	1	0	0	0	1	0	0	2		1	0	0	0	0	0	0	1
6	Ward 7	1	0	1	2		6	Ward 7	1	0	0	0	0	0	0	1		1	0	0	0	0	0	0	1
7	Ward 7	1	1	1	3		7	Ward 7	1	0	1	0	1	1	0	4		1	0	0	0	0	0	0	1
8	Ward 7	1	0	0	1		8	Ward 7	1	1	1	1	1	0	1	6		1	0	0	0	0	0	1	2
9	Ward 8	1	1	1	3		9	Ward 8	1	1	1	1	1	1	0	6		1	1	1	1	1	1	0	6
10	Ward 8	1	1	1	3		10	Ward 8	1	1	1	1	1	1	1	7		1	0	0	0	0	1	1	3
11	Ward 8	1	1	1	3		11	Ward 8	1	1	0	0	1	0	0	3		1	0	0	0	0	0	0	1
12	CCU	1	1	1	3		12	CCU	1	1	1	0	1	0	1	5		1	1	1	0	1	0	1	5
13	ITU	1	0	1	2		13	ITU	1	0	0	0	0	0	0	1		1	0	0	0	0	0	0	1
TOTAL		13	8	12			TOTAL		13	9	8	4	11	4	3			13	3	2	1	2	2	3
Percentage		1	0.615385	0.923077			Percentage		1	0.692308	0.615385	0.307692	0.846154	0.307692	0.230769			1	0.230769	0.153846	0.0769231	0.153846	0.153846	0.230769
8/13 (62%) scored 3/3							Average score Nurse and Case notes	4
							Average Score Case notes only	2
							0% scored 7/7
